# Supplementary material
Source: Elsevier journal article supplement (https://www.sciencedirect.com/science/article/pii/S0301054619300886)
Supplement: mmc1 [file S0301054619300886:mmc1.docx]

**Table 1.** Designed primer sequences for mRNA Expression of Target Genes.

| Gene name |  | Primer sequence (5’-3’) |
| --- | --- | --- |
| TLR4 | Forward primer | 5-ACAAGGCATGGCATGGCTTACAC-3 |
|  | Reverse primer | 5-TGTCTCCACAGCCACCAGATTCTC-3 |
| Myd88 | Forward primer | 5-GCTAGAGCTGCTGGCCTTGTTAG-3 |
|  | Reverse primer | 5-TCTCGGACTCCTGGTTCTGCTG-3 |
| NF-κB | Forward primer | 5-GACACGACAGAATCCTCAGCATCC-3 |
|  | Reverse primer | 5-CCACCAGCAGCAGCAGACATG-3 |
| β-actin | Forward primer | 5-CGCAAAGACCTGTATGCCAAT-3 |
|  | Reverse primer | 5-GGGCTGTGATCTCCTTCTGC-3 |
